# Supplementary material for: Insights into the Relationship between Periodontitis and Systemic Sclerosis Based on the New Periodontitis Classification (2018): A Cross-Sectional Study
Source: MDPI journal article supplement (doi:10.3390/diagnostics14050540), 2024-03-04
Supplement: s1 [file s1]

**Supporting material - Insights into the relationship between periodontitis and systemic sclerosis based on the new periodontitis classification (2018): A cross-sectional study**

**Supplementary Table S1. Multiple logistic regressions predicting stage III/IV or periodontitis, based on group, and adjusted for diabetes, hypertension, and smoking status.**

|                                                      | OR adjusted | (95% CI)       | p     |
|------------------------------------------------------|-------------|----------------|-------|
| <b>Predict Stage III/IV vs Stage II/1 or no *</b>    |             |                |       |
| Group (SSc vs. Control)                              | 1.62        | (0.73 - 3.7)   | 0.243 |
| Diabetes                                             | 1.01        | (0.4 - 2.65)   | 0.984 |
| Hypertension                                         | 1.68        | (0.81 - 3.53)  | 0.169 |
| Smoker (former smoker vs. non-smoker)                | 1.04        | (0.18 - 8.03)  | 0.964 |
| Smoker (actual smoker vs. non-smoker)                | 1.46        | (0.55 - 4.37)  | 0.467 |
| <b>Predict Periodontitis (Yes vs. No), model 1</b>   |             |                |       |
| Group (SSc vs. Control)                              | 2.06        | (0.7 - 6.74)   | 0.205 |
| Diabetes                                             | 1.38        | (0.39 - 6.59)  | 0.643 |
| Hypertension                                         | 2.72        | (0.99 - 7.85)  | 0.055 |
| Smoker (former smoker vs. non-smoker)                | 1.02        | (0.14 - 20.98) | 0.986 |
| Smoker (actual smoker vs. non-smoker)                | 1.93        | (0.48 - 13.05) | 0.41  |
| <b>Predict Periodontitis (Yes vs. No), model 2 *</b> |             |                |       |
| Group (SSc vs. Control)                              | 2.02        | (0.7 - 6.55)   | 0.212 |
| Confounding score                                    | 2.14        | (1.03 - 4.78)  | 0.051 |

SSc, systemic sclerosis; OR, odds ratio; CI, confidence interval; Confounding score is the sum of points for having diabetes, hypertension, or being actual smoker; \*, models without overfitting.

Supporting material - **Insights into the relationship between periodontitis and systemic sclerosis based on the new periodontitis classification (2018): A cross-sectional study**

Table S2. Systemic involvement in systemic sclerosis in relation with periodontitis severity

| Stage<br>Systemic involvement                   | Stage I<br>(n=1) | Stage II<br>(n=8) | Stage III/IV<br>(n=38) | <i>p</i> -value |
|-------------------------------------------------|------------------|-------------------|------------------------|-----------------|
| Cardiac (Yes), n (%)                            | 0 (0)            | 3 (37.5)          | 6 (15.79)              | 0.334           |
| Digestive (Yes), n (%)                          | 1 (100)          | 4 (50)            | 24 (63.16)             | 0.81            |
| Musculoskeletal                                 | 1 (100)          | 3 (37.5)          | 33 (86.84)             | <b>0.007</b>    |
| Anticentromere antibodies<br>(A/B) (Yes), n (%) | 0 (0)            | 3 (37.5)          | 15 (39.47)             | 1               |
| Anti SCL70 antibodies (Yes), n<br>(%)           | 1 (100)          | 5 (62.5)          | 29 (76.32)             | 0.562           |

Abbreviations: n, number; SCL70, topoisomerase type 1;

Table S3. Calprotectin and psoriasin levels in relation with the form of systemic sclerosis

| Systemic sclerosis form               | Diffuse (n=28)     | Limited (n=21)     | Difference (95% CI) | <i>p</i> -value         |
|---------------------------------------|--------------------|--------------------|---------------------|-------------------------|
| Calprotectin (ng/mL),<br>median (IQR) | 2.74 (2.32-3.56)   | 3.32 (2.19 - 4.63) | 0.58 (-1.42 - 0.31) | 0.174<br>●[n1=28,n2=21] |
| Psoriasin (ng/mL),<br>median (IQR)    | 0.49 (0.21 - 1.06) | 0.74 (0.29 - 1.24) | 0.26 (-0.83 - 1.15) | 0.95<br>●[n1=8,n2=6]    |

Abbreviations: CI, confidence interval; IQR, interquartile range; n, number;

Table S4. Calprotectin and psoriasin levels in relation with telangiectasia and cardiac involvement, in systemic sclerosis patients

| Telangiectasia                        | Yes<br>(n=35)            | No<br>(n=18)             | Difference (95% CI)       | <i>p</i> -value     |
|---------------------------------------|--------------------------|--------------------------|---------------------------|---------------------|
| Calprotectin (ng/mL),<br>median (IQR) | 2.611 (1.896<br>– 4.339) | 3.157 (2.413 –<br>4.030) | 0.546 (-1.134 –<br>0.497) | 0.382*[n1=35,n2=18] |
| Psoriasin (pg/mL),<br>median (IQR)    | 0.028 (0.028<br>– 0.21)  | 0.028 (0.028 –<br>0.028) | 0 (0 - 0)                 | 0.061*[n1=35,n2=18] |
| Cardiac involvement                   | Yes<br>(n=11)            | No<br>(n=42)             | Difference (95% CI)       | <i>p</i> -value     |
| Calprotectin (ng/mL),<br>median (IQR) | 4.215 (2.691<br>– 4.825) | 2.744 (2.197 –<br>3.417) | 1.471 (-0.064 –<br>2.128) | 0.083*[n1=11,n2=42] |
| Psoriasin (pg/mL),<br>median (IQR)    | 0.028 (0.028<br>– 0.028) | 0.028 (0.028 –<br>0.067) | 0 (0 - 0)                 | 0.264*[n1=11,n2=42] |

Abbreviations: CI, confidence interval; IQR, interquartile range; n, number;
